# Supplementary material for: Gene Expression Signatures of Energetic Acclimatisation in the Reef Building Coral Acropora millepora
Source: PubMed Central journal article supplement (PMC3650039; doi:10.1371/journal.pone.0061736), 2013-05-09
Supplement: pone.0061736.s001.pdf [file pone.0061736.s001.pdf]

**Likelihood Ratio Tests and Akaike Weights of nested models**

A) Fits of five models to the expression levels of 22 genes in coral sampled from two populations in the field and four times in the laboratory. The X - axis describes the model terms (N = none, T = time, P = source population, + = additive effect, \* = interaction). The y-axis describes Akaike Weights.

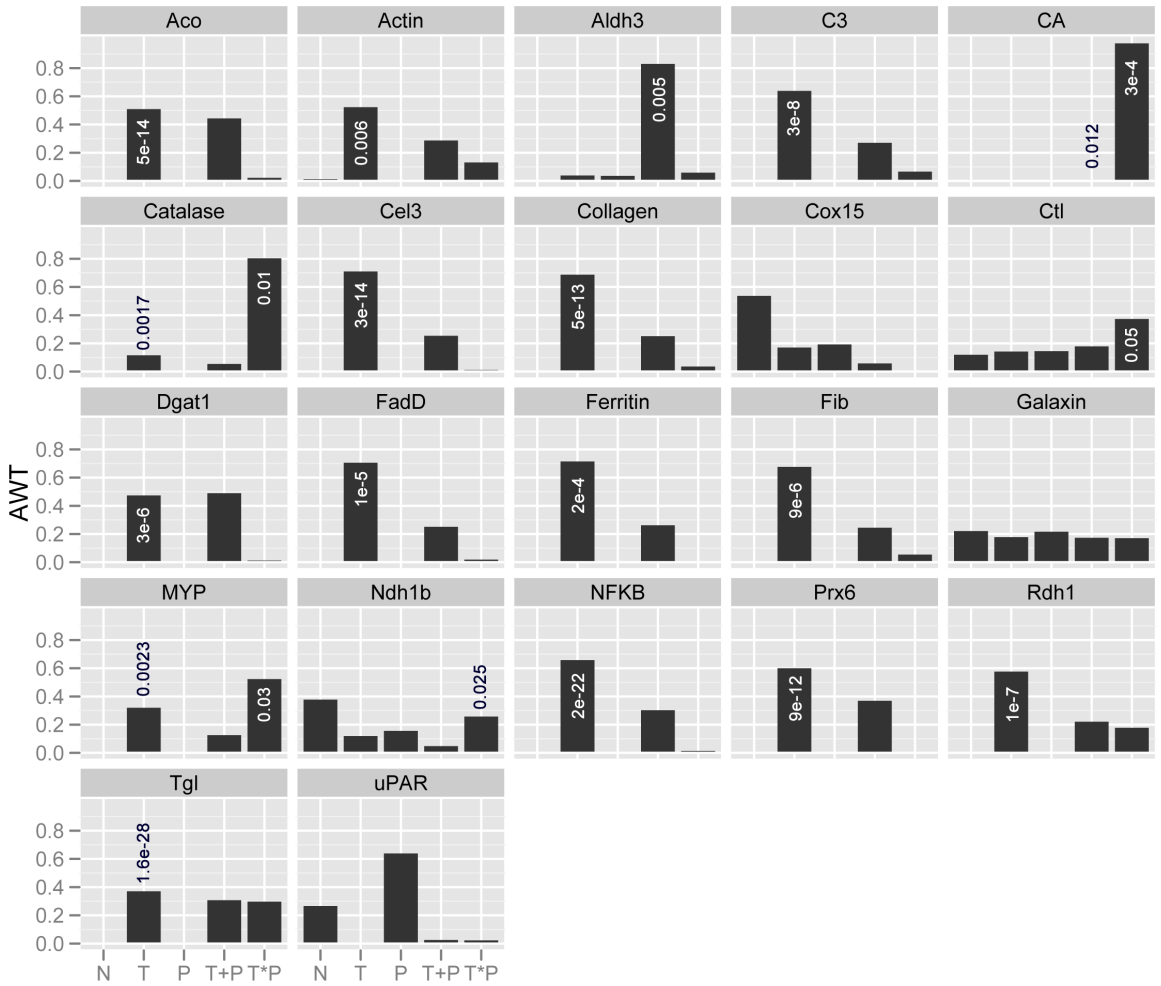

B) Fits of five models to the PSII parameters and standardised lipid content in corals sampled from two populations in the field and four times in the laboratory. The X - axis describes the model terms (N = none, T = time, P = source population, + = additive effect, \* = interaction). The y-axis describes Akaike Weights.

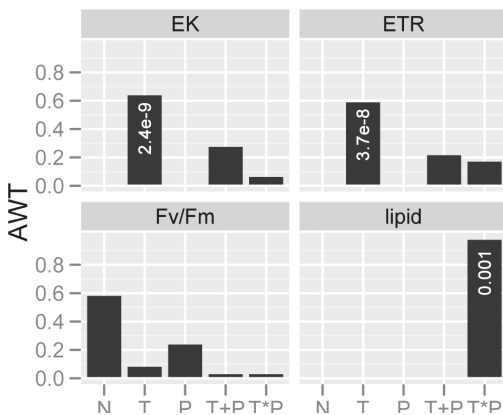

## Pairwise differences in gene expression and physiology among locations and times using MCMC sampling

A) Differences in gene expression per location over time

| Population | gene     | t1     | t2     | pvalue |
|------------|----------|--------|--------|--------|
| DR         | Aco      | time1  | time6  | <5e-04 |
| DR         | Aco      | time6  | time11 | 0.0745 |
| DR         | Aco      | time11 | time19 | 0.389  |
| DR         | Aco      | time19 | time26 | 0.154  |
| DR         | Actin    | time1  | time6  | 0.1205 |
| DR         | Actin    | time6  | time11 | 0.211  |
| DR         | Actin    | time11 | time19 | 0.154  |
| DR         | Actin    | time19 | time26 | 0.083  |
| DR         | Aldh3    | time1  | time6  | 0.3445 |
| DR         | Aldh3    | time6  | time11 | 0.0595 |
| DR         | Aldh3    | time11 | time19 | 0.1615 |
| DR         | Aldh3    | time19 | time26 | 0.5575 |
| DR         | C3       | time1  | time6  | 0.0185 |
| DR         | C3       | time6  | time11 | 0.098  |
| DR         | C3       | time11 | time19 | 0.0565 |
| DR         | C3       | time19 | time26 | 0.4455 |
| DR         | CA       | time1  | time6  | 0.115  |
| DR         | CA       | time6  | time11 | 0.1155 |
| DR         | CA       | time11 | time19 | 0.4275 |
| DR         | CA       | time19 | time26 | 0.2965 |
| DR         | Catalase | time1  | time6  | 0.038  |
| DR         | Catalase | time6  | time11 | 0.013  |
| DR         | Catalase | time11 | time19 | 0.3675 |
| DR         | Catalase | time19 | time26 | 0.2825 |
| DR         | Cel3     | time1  | time6  | <5e-04 |
| DR         | Cel3     | time6  | time11 | 0.1575 |
| DR         | Cel3     | time11 | time19 | 0.11   |
| DR         | Cel3     | time19 | time26 | 0.1515 |
| DR         | Collagen | time1  | time6  | <5e-04 |
| DR         | Collagen | time6  | time11 | 0.156  |
| DR         | Collagen | time11 | time19 | 0.4525 |
| DR         | Collagen | time19 | time26 | 0.032  |
| DR         | Cox15    | time1  | time6  | 0.562  |
| DR         | Cox15    | time6  | time11 | 0.0675 |
| DR         | Cox15    | time11 | time19 | 0.1785 |
| DR         | Cox15    | time19 | time26 | 0.2335 |
| DR         | CTG_1913 | time1  | time6  | 0.326  |
| DR         | CTG_1913 | time6  | time11 | 0.1175 |
| DR         | CTG_1913 | time11 | time19 | 0.035  |
| DR         | CTG_1913 | time19 | time26 | 0.0135 |
| DR         | Ctl      | time1  | time6  | 0.066  |
| DR         | Ctl      | time6  | time11 | 0.5405 |
| DR         | Ctl      | time11 | time19 | 0.0375 |
| DR         | Ctl      | time19 | time26 | 0.003  |
| DR         | Dgat1    | time1  | time6  | 0.0145 |
| DR         | Dgat1    | time6  | time11 | 0.263  |
| DR         | Dgat1    | time11 | time19 | 0.58   |

|    |             |        |        |        |
|----|-------------|--------|--------|--------|
| DR | Dgat1       | time19 | time26 | 0.327  |
| DR | FadD        | time1  | time6  | 0.004  |
| DR | FadD        | time6  | time11 | 0.4415 |
| DR | FadD        | time11 | time19 | 0.0655 |
| DR | FadD        | time19 | time26 | 0.0575 |
| DR | Ferritin    | time1  | time6  | 0.1055 |
| DR | Ferritin    | time6  | time11 | 0.255  |
| DR | Ferritin    | time11 | time19 | 0.4475 |
| DR | Ferritin    | time19 | time26 | 0.0865 |
| DR | Fib         | time1  | time6  | 0.0165 |
| DR | Fib         | time6  | time11 | 0.4745 |
| DR | Fib         | time11 | time19 | 0.4195 |
| DR | Fib         | time19 | time26 | 0.3315 |
| DR | Galaxin     | time1  | time6  | 0.171  |
| DR | Galaxin     | time6  | time11 | 0.0185 |
| DR | Galaxin     | time11 | time19 | 0.0385 |
| DR | Galaxin     | time19 | time26 | 0.427  |
| DR | H.ATPase    | time1  | time6  | 0.094  |
| DR | H.ATPase    | time6  | time11 | 0.0035 |
| DR | H.ATPase    | time11 | time19 | 0.271  |
| DR | H.ATPase    | time19 | time26 | 0.0675 |
| DR | MYP         | time1  | time6  | 0.3245 |
| DR | MYP         | time6  | time11 | 0.617  |
| DR | MYP         | time11 | time19 | 0.006  |
| DR | MYP         | time19 | time26 | 0.275  |
| DR | Na.K.ATPase | time1  | time6  | 0.013  |
| DR | Na.K.ATPase | time6  | time11 | 0.007  |
| DR | Na.K.ATPase | time11 | time19 | 0.3585 |
| DR | Na.K.ATPase | time19 | time26 | 0.1245 |
| DR | Ndh1b       | time1  | time6  | 0.097  |
| DR | Ndh1b       | time6  | time11 | 0.1635 |
| DR | Ndh1b       | time11 | time19 | 0.0065 |
| DR | Ndh1b       | time19 | time26 | 0.0075 |
| DR | NFKB        | time1  | time6  | <5e-04 |
| DR | NFKB        | time6  | time11 | 0.4295 |
| DR | NFKB        | time11 | time19 | 0.0285 |
| DR | NFKB        | time19 | time26 | 0.231  |
| DR | Prx6        | time1  | time6  | <5e-04 |
| DR | Prx6        | time6  | time11 | 0.2615 |
| DR | Prx6        | time11 | time19 | 0.076  |
| DR | Prx6        | time19 | time26 | 0.0565 |
| DR | Rdh1        | time1  | time6  | 0.006  |
| DR | Rdh1        | time6  | time11 | 0.2715 |
| DR | Rdh1        | time11 | time19 | 0.005  |
| DR | Rdh1        | time19 | time26 | 0.1715 |
| DR | RIBOL9      | time1  | time6  | 0.1515 |
| DR | RIBOL9      | time6  | time11 | 0.1625 |
| DR | RIBOL9      | time11 | time19 | 0.149  |
| DR | RIBOL9      | time19 | time26 | 0.298  |
| DR | SOD.MN      | time1  | time6  | 0.087  |
| DR | SOD.MN      | time6  | time11 | 0.1915 |
| DR | SOD.MN      | time11 | time19 | 0.202  |
| DR | SOD.MN      | time19 | time26 | 0.0095 |

|    |          |        |        |        |
|----|----------|--------|--------|--------|
| DR | Tgl      | time1  | time6  | <5e-04 |
| DR | Tgl      | time6  | time11 | 0.0405 |
| DR | Tgl      | time11 | time19 | 0.1725 |
| DR | Tgl      | time19 | time26 | 0.2785 |
| DR | uPAR     | time1  | time6  | 0.1935 |
| DR | uPAR     | time6  | time11 | 0.076  |
| DR | uPAR     | time11 | time19 | 0.1225 |
| DR | uPAR     | time19 | time26 | 0.3695 |
| OI | Aco      | time1  | time6  | <5e-04 |
| OI | Aco      | time6  | time11 | 0.42   |
| OI | Aco      | time11 | time19 | 0.171  |
| OI | Aco      | time19 | time26 | 0.531  |
| OI | Actin    | time1  | time6  | 0.0255 |
| OI | Actin    | time6  | time11 | 0.229  |
| OI | Actin    | time11 | time19 | 0.339  |
| OI | Actin    | time19 | time26 | 0.0425 |
| OI | Aldh3    | time1  | time6  | 0.2305 |
| OI | Aldh3    | time6  | time11 | 0.0875 |
| OI | Aldh3    | time11 | time19 | 0.238  |
| OI | Aldh3    | time19 | time26 | 0.082  |
| OI | C3       | time1  | time6  | 0.004  |
| OI | C3       | time6  | time11 | 0.0485 |
| OI | C3       | time11 | time19 | 0.2855 |
| OI | C3       | time19 | time26 | 0.4695 |
| OI | CA       | time1  | time6  | 0.0025 |
| OI | CA       | time6  | time11 | 0.361  |
| OI | CA       | time11 | time19 | 0.0365 |
| OI | CA       | time19 | time26 | 0.105  |
| OI | Catalase | time1  | time6  | 0.0025 |
| OI | Catalase | time6  | time11 | 0.064  |
| OI | Catalase | time11 | time19 | 0.259  |
| OI | Catalase | time19 | time26 | 0.45   |
| OI | Cel3     | time1  | time6  | <5e-04 |
| OI | Cel3     | time6  | time11 | 0.7195 |
| OI | Cel3     | time11 | time19 | 0.039  |
| OI | Cel3     | time19 | time26 | 0.0545 |
| OI | Collagen | time1  | time6  | <5e-04 |
| OI | Collagen | time6  | time11 | 0.3595 |
| OI | Collagen | time11 | time19 | 0.446  |
| OI | Collagen | time19 | time26 | 0.457  |
| OI | Cox15    | time1  | time6  | 0.059  |
| OI | Cox15    | time6  | time11 | 0.5975 |
| OI | Cox15    | time11 | time19 | 0.237  |
| OI | Cox15    | time19 | time26 | 0.209  |
| OI | CTG_1913 | time1  | time6  | 0.002  |
| OI | CTG_1913 | time6  | time11 | 0.3205 |
| OI | CTG_1913 | time11 | time19 | 0.474  |
| OI | CTG_1913 | time19 | time26 | 0.1215 |
| OI | Ctl      | time1  | time6  | 0.4115 |
| OI | Ctl      | time6  | time11 | 0.157  |
| OI | Ctl      | time11 | time19 | 0.214  |
| OI | Ctl      | time19 | time26 | 0.134  |
| OI | Dgat1    | time1  | time6  | 0.0025 |

|    |             |        |        |          |
|----|-------------|--------|--------|----------|
| OI | Dgat1       | time6  | time11 | 0.5055   |
| OI | Dgat1       | time11 | time19 | 0.1035   |
| OI | Dgat1       | time19 | time26 | 0.169    |
| OI | FadD        | time1  | time6  | 0.003    |
| OI | FadD        | time6  | time11 | 0.277    |
| OI | FadD        | time11 | time19 | 0.4005   |
| OI | FadD        | time19 | time26 | 0.2425   |
| OI | Ferritin    | time1  | time6  | 0.057    |
| OI | Ferritin    | time6  | time11 | 0.2905   |
| OI | Ferritin    | time11 | time19 | 0.4125   |
| OI | Ferritin    | time19 | time26 | 0.231    |
| OI | Fib         | time1  | time6  | 5.00E-04 |
| OI | Fib         | time6  | time11 | 0.41     |
| OI | Fib         | time11 | time19 | 0.5555   |
| OI | Fib         | time19 | time26 | 0.309    |
| OI | Galaxin     | time1  | time6  | 0.352    |
| OI | Galaxin     | time6  | time11 | 0.3525   |
| OI | Galaxin     | time11 | time19 | 0.0605   |
| OI | Galaxin     | time19 | time26 | 0.31     |
| OI | H.ATPase    | time1  | time6  | 0.0705   |
| OI | H.ATPase    | time6  | time11 | 0.0175   |
| OI | H.ATPase    | time11 | time19 | 0.3765   |
| OI | H.ATPase    | time19 | time26 | 0.067    |
| OI | MYP         | time1  | time6  | 5.00E-04 |
| OI | MYP         | time6  | time11 | 0.3495   |
| OI | MYP         | time11 | time19 | 0.171    |
| OI | MYP         | time19 | time26 | 0.196    |
| OI | Na.K.ATPase | time1  | time6  | 0.0685   |
| OI | Na.K.ATPase | time6  | time11 | 0.016    |
| OI | Na.K.ATPase | time11 | time19 | 0.1025   |
| OI | Na.K.ATPase | time19 | time26 | 0.037    |
| OI | Ndh1b       | time1  | time6  | 0.247    |
| OI | Ndh1b       | time6  | time11 | 0.427    |
| OI | Ndh1b       | time11 | time19 | 0.3675   |
| OI | Ndh1b       | time19 | time26 | 0.0895   |
| OI | NFKB        | time1  | time6  | <5e-04   |
| OI | NFKB        | time6  | time11 | 0.312    |
| OI | NFKB        | time11 | time19 | 0.246    |
| OI | NFKB        | time19 | time26 | 0.078    |
| OI | Prx6        | time1  | time6  | <5e-04   |
| OI | Prx6        | time6  | time11 | 0.1265   |
| OI | Prx6        | time11 | time19 | 0.235    |
| OI | Prx6        | time19 | time26 | 0.429    |
| OI | Rdh1        | time1  | time6  | 5.00E-04 |
| OI | Rdh1        | time6  | time11 | 0.281    |
| OI | Rdh1        | time11 | time19 | 0.2615   |
| OI | Rdh1        | time19 | time26 | 0.1845   |
| OI | RIBOL9      | time1  | time6  | 0.3305   |
| OI | RIBOL9      | time6  | time11 | 0.0525   |
| OI | RIBOL9      | time11 | time19 | 0.1755   |
| OI | RIBOL9      | time19 | time26 | 0.336    |
| OI | SOD.MN      | time1  | time6  | 0.2665   |
| OI | SOD.MN      | time6  | time11 | 0.2205   |

|    |        |        |        |        |
|----|--------|--------|--------|--------|
| OI | SOD.MN | time11 | time19 | 0.128  |
| OI | SOD.MN | time19 | time26 | 0.1835 |
| OI | Tgl    | time1  | time6  | <5e-04 |
| OI | Tgl    | time6  | time11 | 0.187  |
| OI | Tgl    | time11 | time19 | 0.3115 |
| OI | Tgl    | time19 | time26 | 0.099  |
| OI | uPAR   | time1  | time6  | 0.2175 |
| OI | uPAR   | time6  | time11 | 0.1175 |
| OI | uPAR   | time11 | time19 | 0.0375 |
| OI | uPAR   | time19 | time26 | 0.0685 |

B) Differences in gene expression over time averaged across locations

| gene     | t1     | t2     | pvalue |
|----------|--------|--------|--------|
| Aco      | time1  | time6  | <5e-04 |
| Aco      | time11 | time19 | 0.3335 |
| Aco      | time19 | time26 | 0.2615 |
| Aco      | time6  | time11 | 0.125  |
| Actin    | time1  | time6  | 0.015  |
| Actin    | time11 | time19 | 0.346  |
| Actin    | time19 | time26 | 0.435  |
| Actin    | time6  | time11 | 0.142  |
| Aldh3    | time1  | time6  | 0.207  |
| Aldh3    | time11 | time19 | 0.394  |
| Aldh3    | time19 | time26 | 0.192  |
| Aldh3    | time6  | time11 | 0.012  |
| C3       | time1  | time6  | 0.001  |
| C3       | time11 | time19 | 0.2545 |
| C3       | time19 | time26 | 0.47   |
| C3       | time6  | time11 | 0.0195 |
| CA       | time1  | time6  | 0.119  |
| CA       | time11 | time19 | 0.1505 |
| CA       | time19 | time26 | 0.128  |
| CA       | time6  | time11 | 0.281  |
| Catalase | time1  | time6  | 0.2235 |
| Catalase | time11 | time19 | 0.257  |
| Catalase | time19 | time26 | 0.369  |
| Catalase | time6  | time11 | 0.0035 |
| Cel3     | time1  | time6  | <5e-04 |
| Cel3     | time11 | time19 | 0.0165 |
| Cel3     | time19 | time26 | 0.0325 |
| Cel3     | time6  | time11 | 0.3765 |
| Collagen | time1  | time6  | <5e-04 |
| Collagen | time11 | time19 | 0.4635 |
| Collagen | time19 | time26 | 0.12   |
| Collagen | time6  | time11 | 0.164  |
| Cox15    | time1  | time6  | 0.1315 |
| Cox15    | time11 | time19 | 0.444  |
| Cox15    | time19 | time26 | 0.4905 |
| Cox15    | time6  | time11 | 0.2    |
| CTG_1913 | time1  | time6  | 0.017  |
| CTG_1913 | time11 | time19 | 0.1145 |
| CTG_1913 | time19 | time26 | 0.2375 |

|             |        |        |        |
|-------------|--------|--------|--------|
| CTG_1913    | time6  | time11 | 0.13   |
| Ctl         | time1  | time6  | 0.196  |
| Ctl         | time11 | time19 | 0.039  |
| Ctl         | time19 | time26 | 0.0055 |
| Ctl         | time6  | time11 | 0.259  |
| Dgat1       | time1  | time6  | 0.002  |
| Dgat1       | time11 | time19 | 0.138  |
| Dgat1       | time19 | time26 | 0.342  |
| Dgat1       | time6  | time11 | 0.3095 |
| FadD        | time1  | time6  | <5e-04 |
| FadD        | time11 | time19 | 0.1805 |
| FadD        | time19 | time26 | 0.261  |
| FadD        | time6  | time11 | 0.374  |
| Ferritin    | time1  | time6  | 0.022  |
| Ferritin    | time11 | time19 | 0.4005 |
| Ferritin    | time19 | time26 | 0.0735 |
| Ferritin    | time6  | time11 | 0.184  |
| Fib         | time1  | time6  | <5e-04 |
| Fib         | time11 | time19 | 0.5045 |
| Fib         | time19 | time26 | 0.256  |
| Fib         | time6  | time11 | 0.4175 |
| Galaxin     | time1  | time6  | 0.173  |
| Galaxin     | time11 | time19 | 0.014  |
| Galaxin     | time19 | time26 | 0.4285 |
| Galaxin     | time6  | time11 | 0.1135 |
| H.ATPase    | time1  | time6  | 0.026  |
| H.ATPase    | time11 | time19 | 0.3875 |
| H.ATPase    | time19 | time26 | 0.5035 |
| H.ATPase    | time6  | time11 | <5e-04 |
| MYP         | time1  | time6  | 0.006  |
| MYP         | time11 | time19 | 0.0115 |
| MYP         | time19 | time26 | 0.4295 |
| MYP         | time6  | time11 | 0.495  |
| Na.K.ATPase | time1  | time6  | 0.004  |
| Na.K.ATPase | time11 | time19 | 0.117  |
| Na.K.ATPase | time19 | time26 | 0.0125 |
| Na.K.ATPase | time6  | time11 | 0.001  |
| Ndh1b       | time1  | time6  | 0.093  |
| Ndh1b       | time11 | time19 | 0.065  |
| Ndh1b       | time19 | time26 | 0.1735 |
| Ndh1b       | time6  | time11 | 0.23   |
| NFKB        | time1  | time6  | <5e-04 |
| NFKB        | time11 | time19 | 0.0275 |
| NFKB        | time19 | time26 | 0.057  |
| NFKB        | time6  | time11 | 0.369  |
| Prx6        | time1  | time6  | <5e-04 |
| Prx6        | time11 | time19 | 0.0605 |
| Prx6        | time19 | time26 | 0.108  |
| Prx6        | time6  | time11 | 0.1055 |
| Rdh1        | time1  | time6  | <5e-04 |
| Rdh1        | time11 | time19 | 0.0675 |
| Rdh1        | time19 | time26 | 0.5515 |
| Rdh1        | time6  | time11 | 0.526  |

|        |        |        |        |
|--------|--------|--------|--------|
| RIBOL9 | time1  | time6  | 0.1555 |
| RIBOL9 | time11 | time19 | 0.086  |
| RIBOL9 | time19 | time26 | 0.478  |
| RIBOL9 | time6  | time11 | 0.02   |
| SOD.MN | time1  | time6  | 0.0835 |
| SOD.MN | time11 | time19 | 0.083  |
| SOD.MN | time19 | time26 | 0.0095 |
| SOD.MN | time6  | time11 | 0.119  |
| Tgl    | time1  | time6  | <5e-04 |
| Tgl    | time11 | time19 | 0.162  |
| Tgl    | time19 | time26 | 0.097  |
| Tgl    | time6  | time11 | 0.033  |
| uPAR   | time1  | time6  | 0.4195 |
| uPAR   | time11 | time19 | 0.3385 |
| uPAR   | time19 | time26 | 0.11   |
| uPAR   | time6  | time11 | 0.385  |

C) Difference in gene expression between locations at specific times

| gene     | time   | pvalue   |
|----------|--------|----------|
| Aco      | time1  | 0.084    |
| Aco      | time11 | 0.187    |
| Aco      | time19 | 0.413    |
| Aco      | time26 | 0.1765   |
| Aco      | time6  | 0.373    |
| Actin    | time1  | 0.475    |
| Actin    | time11 | 0.257    |
| Actin    | time19 | 0.021    |
| Actin    | time26 | 0.215    |
| Actin    | time6  | 0.2235   |
| Aldh3    | time1  | 0.0105   |
| Aldh3    | time11 | 0.014    |
| Aldh3    | time19 | 0.247    |
| Aldh3    | time26 | 0.02     |
| Aldh3    | time6  | 0.0275   |
| C3       | time1  | 0.2695   |
| C3       | time11 | 0.1345   |
| C3       | time19 | 0.575    |
| C3       | time26 | 0.3495   |
| C3       | time6  | 0.1685   |
| CA       | time1  | 0.069    |
| CA       | time11 | 5.00E-04 |
| CA       | time19 | 0.0335   |
| CA       | time26 | 0.01     |
| CA       | time6  | 0.023    |
| Catalase | time1  | 5.00E-04 |
| Catalase | time11 | 0.323    |
| Catalase | time19 | 0.4255   |
| Catalase | time26 | 0.282    |
| Catalase | time6  | 0.083    |
| Cel3     | time1  | 0.3695   |
| Cel3     | time11 | 0.304    |
| Cel3     | time19 | 0.408    |



|          |        |        |
|----------|--------|--------|
| Cel3     | time26 | 0.303  |
| Cel3     | time6  | 0.342  |
| Collagen | time1  | 0.3195 |
| Collagen | time11 | 0.3595 |
| Collagen | time19 | 0.355  |
| Collagen | time26 | 0.1505 |
| Collagen | time6  | 0.202  |
| Cox15    | time1  | 0.223  |
| Cox15    | time11 | 0.2615 |
| Cox15    | time19 | 0.162  |
| Cox15    | time26 | 0.2615 |
| Cox15    | time6  | 0.139  |
| CTG_1913 | time1  | 0.193  |
| CTG_1913 | time11 | 0.2685 |
| CTG_1913 | time19 | 0.003  |
| CTG_1913 | time26 | 0.198  |
| CTG_1913 | time6  | 0.0675 |
| Ctl      | time1  | 0.386  |
| Ctl      | time11 | 0.0555 |
| Ctl      | time19 | 0.0145 |
| Ctl      | time26 | 0.0925 |
| Ctl      | time6  | 0.1275 |
| Dgat1    | time1  | 0.215  |
| Dgat1    | time11 | 0.155  |
| Dgat1    | time19 | 0.4795 |
| Dgat1    | time26 | 0.089  |
| Dgat1    | time6  | 0.308  |
| FadD     | time1  | 0.4825 |
| FadD     | time11 | 0.3115 |
| FadD     | time19 | 0.228  |
| FadD     | time26 | 0.205  |
| FadD     | time6  | 0.4665 |
| Ferritin | time1  | 0.5275 |
| Ferritin | time11 | 0.384  |
| Ferritin | time19 | 0.4    |
| Ferritin | time26 | 0.42   |
| Ferritin | time6  | 0.372  |
| Fib      | time1  | 0.116  |
| Fib      | time11 | 0.499  |
| Fib      | time19 | 0.429  |
| Fib      | time26 | 0.4405 |
| Fib      | time6  | 0.5145 |
| Galaxin  | time1  | 0.3455 |
| Galaxin  | time11 | 0.022  |
| Galaxin  | time19 | 0.039  |
| Galaxin  | time26 | 0.108  |
| Galaxin  | time6  | 0.4805 |
| H.ATPase | time1  | 0.1385 |
| H.ATPase | time11 | 0.094  |
| H.ATPase | time19 | 0.226  |
| H.ATPase | time26 | 0.0045 |
| H.ATPase | time6  | 0.1545 |
| MYP      | time1  | 0.0245 |

|             |        |        |
|-------------|--------|--------|
| MYP         | time11 | 0.366  |
| MYP         | time19 | 0.04   |
| MYP         | time26 | 0.3775 |
| MYP         | time6  | 0.1915 |
| Na.K.ATPase | time1  | 0.2885 |
| Na.K.ATPase | time11 | 0.0925 |
| Na.K.ATPase | time19 | 0.26   |
| Na.K.ATPase | time26 | 0.117  |
| Na.K.ATPase | time6  | 0.143  |
| Ndh1b       | time1  | 0.5215 |
| Ndh1b       | time11 | 0.4825 |
| Ndh1b       | time19 | 0.0135 |
| Ndh1b       | time26 | 0.171  |
| Ndh1b       | time6  | 0.269  |
| NFKB        | time1  | 0.277  |
| NFKB        | time11 | 0.469  |
| NFKB        | time19 | 0.2415 |
| NFKB        | time26 | 0.16   |
| NFKB        | time6  | 0.368  |
| Prx6        | time1  | 0.2675 |
| Prx6        | time11 | 0.2835 |
| Prx6        | time19 | 0.518  |
| Prx6        | time26 | 0.1585 |
| Prx6        | time6  | 0.157  |
| Rdh1        | time1  | 0.2175 |
| Rdh1        | time11 | 0.151  |
| Rdh1        | time19 | 0.0575 |
| Rdh1        | time26 | 0.5365 |
| Rdh1        | time6  | 0.4485 |
| RIBOL9      | time1  | 0.481  |
| RIBOL9      | time11 | 0.526  |
| RIBOL9      | time19 | 0.4345 |
| RIBOL9      | time26 | 0.349  |
| RIBOL9      | time6  | 0.3965 |
| SOD.MN      | time1  | 0.3675 |
| SOD.MN      | time11 | 0.408  |
| SOD.MN      | time19 | 0.489  |
| SOD.MN      | time26 | 0.1855 |
| SOD.MN      | time6  | 0.563  |
| Tgl         | time1  | 0.2855 |
| Tgl         | time11 | 0.073  |
| Tgl         | time19 | 0.0405 |
| Tgl         | time26 | 0.105  |
| Tgl         | time6  | 0.1745 |
| uPAR        | time1  | 0.03   |
| uPAR        | time11 | 0.0065 |
| uPAR        | time19 | 0.542  |
| uPAR        | time26 | 0.128  |
| uPAR        | time6  | 0.3245 |

D) Differences in PAM measurements over time (averaged across locations)

| PAM measure | t1     | t2     | pvalue   |
|-------------|--------|--------|----------|
| ek          | time1  | time6  | 0.0755   |
| ek          | time1  | time11 | 5.00E-04 |
| ek          | time1  | time19 | <5e-04   |
| ek          | time1  | time26 | <5e-04   |
| ek          | time6  | time11 | 0.04     |
| ek          | time6  | time19 | <5e-04   |
| ek          | time6  | time26 | <5e-04   |
| ek          | time11 | time19 | 0.0055   |
| ek          | time11 | time26 | <5e-04   |
| ek          | time19 | time26 | 0.295    |
| etr         | time1  | time6  | 0.221    |
| etr         | time1  | time11 | 0.002    |
| etr         | time1  | time19 | <5e-04   |
| etr         | time1  | time26 | <5e-04   |
| etr         | time6  | time11 | 0.0065   |
| etr         | time6  | time19 | <5e-04   |
| etr         | time6  | time26 | <5e-04   |
| etr         | time11 | time19 | 0.0155   |
| etr         | time11 | time26 | 0.0075   |
| etr         | time19 | time26 | 0.5735   |
| fvfm        | time1  | time6  | 0.2695   |
| fvfm        | time1  | time11 | 0.3475   |
| fvfm        | time1  | time19 | 0.0325   |
| fvfm        | time1  | time26 | 0.2845   |
| fvfm        | time6  | time11 | 0.5885   |
| fvfm        | time6  | time19 | 0.0925   |
| fvfm        | time6  | time26 | 0.4995   |
| fvfm        | time11 | time19 | 0.0675   |
| fvfm        | time11 | time26 | 0.426    |
| fvfm        | time19 | time26 | 0.1025   |

E) Differences in lipid content of locations over time

| pop | t1     | t2     | pvalue |
|-----|--------|--------|--------|
| dr  | time1  | time10 | 0.1975 |
| dr  | time1  | time26 | 0.003  |
| dr  | time10 | time26 | 0.0175 |
| oi  | time1  | time10 | 0.0015 |
| oi  | time1  | time26 | <5e-04 |
| oi  | time10 | time26 | <5e-04 |

F) Differences in lipid content between locations

| time   | pvalue   |
|--------|----------|
| time1  | 5.00E-04 |
| time10 | 0.0595   |
| time26 | 0.43     |
