# Supplementary material for: Gene Expression Signatures of Energetic Acclimatisation in the Reef Building Coral Acropora millepora
Source: PubMed Central journal article supplement (PMC3650039; doi:10.1371/journal.pone.0061736), 2013-05-09
Supplement: pone.0061736.s002.pdf [file pone.0061736.s002.pdf]

**Supporting Information File S2:** Genes included in the gene expression assay, abbreviations, accession numbers, concentration of primer in Reverse Primer Plex (nM), length of the transcript (bp) and Oligo sequences.

| Protein name                                      | Abbreviation       | Acc. num.    | Conc | Bp  | Oligo sequences                                                                           |
|---------------------------------------------------|--------------------|--------------|------|-----|-------------------------------------------------------------------------------------------|
| Complement-component 3                            | <i>C3</i>          | EF090257     | 50   | 137 | L: AGGTGACACTATAGAATAAGTTTCTCGTGGTCGCATTT<br>R: GTACGACTCACTATAGGGATGATGGAGACATTTGAGGGG   |
| Nuclear factor Kappa-B, Subunit 2                 | <i>Nf-kb2</i>      | EZ002200     | 500  | 197 | L: AGGTGACACTATAGAATAAAATCCAATGCCTCATGCTC<br>R: GTACGACTCACTATAGGGATCTGTCCATCAACACCAAGC   |
| Hemolytic lectin                                  | <i>Cel3</i>        | GO003659     | 500  | 187 | L: AGGTGACACTATAGAATATGGCAGGAAGCAAGAGAAAT<br>R: GTACGACTCACTATAGGGATGCCAGTAGTTTCCCTCTGG   |
| C type lectin                                     | <i>Ctl</i>         | GO001638     | 500  | 237 | L: AGGTGACACTATAGAATAAACAGGTGTTCTCGTCTCGTCC<br>R: GTACGACTCACTATAGGGAACGACTTTGTGCTGGCTCTT |
| Urokinase                                         | <i>Upar</i>        | SeqIndex3826 | 1000 | 147 | L: AGGTGACACTATAGAATATGAGAGCTCGAAGAGTTGGA<br>R: GTACGACTCACTATAGGGATGCTGTCCCTGTTTTCTGTG   |
| Superoxide dismutase                              | <i>MnSod</i>       | DY581262     | 500  | 172 | L: AGGTGACACTATAGAATAATGTTGTGCCGTAGTGTTCCG<br>R: GTACGACTCACTATAGGGAGATTGCAGGTTTCAAGGCAT  |
| Catalase                                          | <i>Cat</i>         | EZ013640     | 500  | 177 | L: AGGTGACACTATAGAATAATCCGCTGATTACTGTTGGC<br>R: GTACGACTCACTATAGGGAGCGACCCTGCAACATCTTAT   |
| Soma ferritin                                     | <i>Sof</i>         | DY580747     | 500  | 182 | L: AGGTGACACTATAGAATAGTGGCTGACACTCATGGAGA<br>R: GTACGACTCACTATAGGGACAAACTGGTATTCCGCCAGT   |
| H <sup>+</sup> transporting ATPase                | <i>H-ATPase</i>    | GO004405     | 500  | 167 | L: AGGTGACACTATAGAATACTTTTTGGTGGAGCTGGTGT<br>R: GTACGACTCACTATAGGGAACAAATCGTTTCCTTCACGG   |
| Na <sup>+</sup> /K <sup>+</sup> exchanging ATPase | <i>Na,K-ATPase</i> | DY580462     | 500  | 157 | L: AGGTGACACTATAGAATATGGCTATGACGAAGGGAAAC<br>R: GTACGACTCACTATAGGGATCGCTTTGATCCTTTTCGTT   |
| Cytochrome c oxidase subunit XV                   | <i>Cox15</i>       | DY578450     | 1000 | 142 | L: AGGTGACACTATAGAATACAAACCCCTTGCTTGGATAA<br>R: GTACGACTCACTATAGGGAGGAGCAACTGAAGCATCCAT   |
| Aldehyde dehydrogenase 3                          | <i>Aldh3</i>       | DY579229     | 500  | 232 | L: AGGTGACACTATAGAATAATGTGGAGTTCAGGCGATGT<br>R: GTACGACTCACTATAGGGAGGCATTGAGGTGTAACCCAT   |
| NADH dehydrogenase I chain B                      | <i>Ndh1b</i>       | DY584577     | 1000 | 297 | L: AGGTGACACTATAGAATAAGAACCGGTTGCAGTGTTTT<br>R: GTACGACTCACTATAGGGATGCATCATTTTCAACAGCACA  |
| Peroxiredoxin 6                                   | <i>Prx6</i>        | DY580542     | 1000 | 192 | L: AGGTGACACTATAGAATAAATGGTGAACCTTGGAGACG<br>R: GTACGACTCACTATAGGGAACACACGTCCTCAACTCTGTG  |

|                                       |                |               |      |     |                                                                                          |
|---------------------------------------|----------------|---------------|------|-----|------------------------------------------------------------------------------------------|
| Triacylglycerol lipase                | <i>Tgl</i>     | GO004043      | 1000 | 222 | L: AGGTGACACTATAGAATAGTTGGAACATTGCGGAGAAT<br>R: GTACGACTCACTATAGGGAGACCAAAGAGGCACAAAGGA  |
| Retinol dehydrogenase 1               | <i>Rdh1</i>    | GO002865      | 500  | 272 | L: AGGTGACACTATAGAATAAAAATTCCTCCCATCCTTGT<br>R: GTACGACTCACTATAGGGAGCTCGCCTCTGATTTCAAAC  |
| Diacylglycerol O-acyltransferase      | <i>Dgat1</i>   | DY578905      | 500  | 152 | L: AGGTGACACTATAGAATATCAACCAAGTCAGCAATCCA<br>R: GTACGACTCACTATAGGGAAGCTTGGGTGAAATCCCTCT  |
| Acyl-CoA oxidase                      | <i>Aco</i>     | DY580294      | 1000 | 202 | L: AGGTGACACTATAGAATATATTTGCTGCACACGAGCTT<br>R: GTACGACTCACTATAGGGACAAAGCAGCCAACATCCTCT  |
| Carbonic anhydrase                    | <i>CA</i>      | GO000656      | 500  | 212 | L: AGGTGACACTATAGAATAACCTACGATGGATCGCTGAC<br>R: GTACGACTCACTATAGGGACTTCGAGAATGCACTGGACA  |
| Major yolk protein                    | <i>Myp</i>     | SeqIndex3069  | 500  | 227 | L: AGGTGACACTATAGAATAAAAAGGATGGCCACAGAGTTG<br>R: GTACGACTCACTATAGGGAATTTCTCAGCCATGATCGG  |
| Vitellogenin precursor                | <i>VgnP</i>    | GO000214      | 1000 | 242 | L: AGGTGACACTATAGAATAACCTTTGTTGGCTGGATTTG<br>R: GTACGACTCACTATAGGGAGTGTGGCATTGTGGAGACA   |
| Long-chain fatty-acid-CoA ligase      | <i>FadD</i>    | DY586156      | 500  | 277 | L: AGGTGACACTATAGAATATTACGGAAGCTGTGCTGAAA<br>R: GTACGACTCACTATAGGGATGGACATAAAAACCCCGAAG  |
| Actin1                                | <i>Actin1</i>  | SeqIndex13222 | 200  | 247 | L: AGGTGACACTATAGAATACCCAGAGGCTATGTTTTCAGC<br>R: GTACGACTCACTATAGGGAATCTTCATGGTTGGTGGAGC |
| Collagen                              | <i>Coll</i>    | SeqIndex9903  | 500  | 252 | L: AGGTGACACTATAGAATAAATAAAGGACCAGGAGCCGT<br>R: GTACGACTCACTATAGGGATCACGACAAGTCTTTGCTGG  |
| Galaxin                               | <i>Gal</i>     | SeqIndex676   | 1000 | 162 | L: AGGTGACACTATAGAATAAGGAGAGACGCCCATAGTGA<br>R: GTACGACTCACTATAGGGATTTCCGTGACAGCACATCTC  |
| Fibrinogen                            | <i>Fib</i>     | SeqIndex2262  | 1000 | 267 | L: AGGTGACACTATAGAATATCCAAAACAACACCTGCAAA<br>R: GTACGACTCACTATAGGGAGCATTGCTTTCCCGAGTATC  |
| 60S Ribosomal protein L9-like isoform | <i>RIBOL9</i>  | DY586572      | 1000 | 257 | L: AGGTGACACTATAGAATAAGAATGTCACCGTCAAGGCT<br>R: GTACGACTCACTATAGGGATTGTAGCCATAGACGACCCC  |
| Unknown transcript                    | <i>Ctg1913</i> | DY585358      | 500  | 262 | L: AGGTGACACTATAGAATATACCGTACCGTAACCAAGG<br>R: GTACGACTCACTATAGGGATCAGTGCTTCACTGGCATT    |

---
